# Supplementary material for: ESTRO-ACROP guideline for positioning, immobilisation and setup verification for local and loco-regional photon breast cancer irradiation
Source: PubMed Central journal article supplement — Tech Innov Patient Support Radiat Oncol. 2023 Sep 12;28:100219. doi: 10.1016/j.tipsro.2023.100219 (PMC10511493; doi:10.1016/j.tipsro.2023.100219), 2023-09-12
Supplement: mmc1.pdf [file mmc1.pdf]

Supplementary Table 1

The literature review was undertaken by the librarian of Haaglanden Medical Center and the librarian of Sheffield Hallam University in close collaboration with two of the authors of the guideline. This review was complemented with the experiences and the specific knowledge of the globally distributed authors of this guideline.

|                          |            |                                                                                                                                                                                                                                                                                                                                                                                                                                                                                                                                                                                                                                                                                                                                                                                                                                                                                                                                                                                                                                                                                                                                                                                                                                                                                                                                                                                                                                                                                                                                                                                                                                                                                                                                                                                                                                                                                                                                                                                                                                                                                                                                                                                                                                                                                                                                                                                                                                                                                                                                                                                                                                                                  |
|--------------------------|------------|------------------------------------------------------------------------------------------------------------------------------------------------------------------------------------------------------------------------------------------------------------------------------------------------------------------------------------------------------------------------------------------------------------------------------------------------------------------------------------------------------------------------------------------------------------------------------------------------------------------------------------------------------------------------------------------------------------------------------------------------------------------------------------------------------------------------------------------------------------------------------------------------------------------------------------------------------------------------------------------------------------------------------------------------------------------------------------------------------------------------------------------------------------------------------------------------------------------------------------------------------------------------------------------------------------------------------------------------------------------------------------------------------------------------------------------------------------------------------------------------------------------------------------------------------------------------------------------------------------------------------------------------------------------------------------------------------------------------------------------------------------------------------------------------------------------------------------------------------------------------------------------------------------------------------------------------------------------------------------------------------------------------------------------------------------------------------------------------------------------------------------------------------------------------------------------------------------------------------------------------------------------------------------------------------------------------------------------------------------------------------------------------------------------------------------------------------------------------------------------------------------------------------------------------------------------------------------------------------------------------------------------------------------------|
| Pubmed                   | 02-01-2019 | <p>Search terms:</p> <p>((("Breast Neoplasms"[Mesh] OR ("mamma"[tiab] OR mamma*[tiab] OR mammae*[tiab] OR "mammas"[tiab] OR mammar*[tiab] OR breast*[tiab]) AND (tumour*[tiab] OR tumor*[ti] OR "tumor"[tiab] OR tumor*[tiab] OR tumors*[tiab] OR neoplas*[tiab] OR neo-plas*[tiab] OR cancer*[tiab] OR carcinoma*[tiab] OR carci-noma*[tiab] OR malign*[tiab]))) AND ("Patient Positioning"[Mesh] OR set-up*[tiab] OR setup*[tiab] OR tattoo*[tiab] OR tatoo*[tiab] OR position*[tiab] OR "Cone-Beam Computed Tomography"[Mesh] OR cone-beam*[tiab] OR conebeam*[tiab] OR cbct*[tiab] OR cb-ct*[tiab] OR gold-marker*[tiab] OR goldmarker*[tiab] OR fiducial-mark*[tiab] OR "surgical clip"[tiab] OR surgical-clip*[tiab] OR surgical-clips*[tiab] OR portal-imag*[tiab] OR "Prone Position"[Mesh] OR semiprone*[tiab] OR "prone"[tiab] OR prone*[tiab] OR proneposition*[tiab] OR procubitus*[tiab] OR "Supine Position"[Mesh] OR semisupine*[tiab] OR supine*[tiab] OR ("semi"[ti] OR semilateral*[ti] OR lateral*[ti] OR position*[ti] AND decubitus*[ti] OR semi-decubitus*[tiab] OR semidecubitus*[tiab] OR semilateral-decubitus*[tiab] OR lateral-decubitus*[tiab] OR decubitus-lateral*[tiab] OR decubitus position*[tiab] OR surface-based*[tiab] OR surfacebased*[tiab] OR "Imaging, Three-Dimensional"[Mesh] OR ((three-dimension*[tiab] OR threedimension*[tiab] OR tree-dimension*[tiab] OR treedimension*[tiab] OR 3-dimension*[tiab] OR 3dimension*[tiab] OR "3-d"[tiab] OR 3-d*[tiab] OR "3d"[tiab] OR 3d*[tiab])) AND (surface-scan*[tiab] OR surfacescan*[tiab])) OR ((fixati*[ti] OR position*[ti] OR immobil*[ti]) AND device*[ti]) OR fixation-device*[tiab] OR positioning-device*[tiab] OR immobilisation-device*[tiab] OR immobilization-device*[tiab]) AND ("Immobilization"[Mesh] OR immobilis*[tiab] OR immobiliz*[tiab] OR motion*[tiab]) AND ("2007/01/01"[PDAT] : "3000/12/31"[PDAT])) OR ((("Breast Neoplasms"[Mesh] OR ("mamma"[tiab] OR mamma*[tiab] OR mammae*[tiab] OR "mammas"[tiab] OR mammar*[tiab] OR breast*[tiab]) AND (tumour*[tiab] OR tumor*[ti] OR "tumor"[tiab] OR tumor*[tiab] OR tumors*[tiab] OR neoplas*[tiab] OR neo-plas*[tiab] OR cancer*[tiab] OR carcinoma*[tiab] OR carci-noma*[tiab] OR malign*[tiab]))) AND (set-up*[ti] OR setup*[ti] OR ((fixati*[ti] OR position*[ti] OR immobil*[ti]) AND device*[ti]) OR ("semi"[ti] OR semilateral*[ti] OR lateral*[ti] OR position*[ti] AND decubitus*[ti] OR semidecubitus*[ti] OR procubitus*[ti] OR semiprone*[ti] OR "prone"[ti] OR prone*[ti] OR proneposition*[ti] OR semisupine*[ti] OR supine*[ti]) AND ("2007/01/01"[PDAT] : "3000/12/31"[PDAT]))</p> |
| Google Scholar<br>Chrome | 12-01-2019 | stopped when references ceased to be relevant                                                                                                                                                                                                                                                                                                                                                                                                                                                                                                                                                                                                                                                                                                                                                                                                                                                                                                                                                                                                                                                                                                                                                                                                                                                                                                                                                                                                                                                                                                                                                                                                                                                                                                                                                                                                                                                                                                                                                                                                                                                                                                                                                                                                                                                                                                                                                                                                                                                                                                                                                                                                                    |
