# Supplementary material for: ESTRO-ACROP guideline for positioning, immobilisation and setup verification for local and loco-regional photon breast cancer irradiation
Source: PubMed Central journal article supplement — Tech Innov Patient Support Radiat Oncol. 2023 Sep 12;28:100219. doi: 10.1016/j.tipsro.2023.100219 (PMC10511493; doi:10.1016/j.tipsro.2023.100219), 2023-09-12
Supplement: mmc2.pdf [file mmc2.pdf]

| <b>Bibliographic reference</b>                                                                                                                                                               | <b>Study type/ Design</b>                                                                                                                                                                     | <b>Study quality (risk of bias)</b> | <b>Sample size n=</b>                                                      | <b>Participant characteristics</b>                                                                                                        | <b>Participant Positioning: prone/supine</b>                                                                                                                                                                                                                                                                                                                                           | <b>Participant Positioning: arms</b>                                                                               | <b>Participant Positioning: flat/elevated</b> |
|----------------------------------------------------------------------------------------------------------------------------------------------------------------------------------------------|-----------------------------------------------------------------------------------------------------------------------------------------------------------------------------------------------|-------------------------------------|----------------------------------------------------------------------------|-------------------------------------------------------------------------------------------------------------------------------------------|----------------------------------------------------------------------------------------------------------------------------------------------------------------------------------------------------------------------------------------------------------------------------------------------------------------------------------------------------------------------------------------|--------------------------------------------------------------------------------------------------------------------|-----------------------------------------------|
| Mulliez et al. Hypofractionated whole breast irradiation for patients with large breasts: A randomized trial comparing prone and supine positions. Radiotherapy and Oncology 2013;108:203–8. | Non-blinded, randomized mono-centric trial<br><br>Primary endpoint: Acute moist skin desquamation. Secondary endpoints: Dermatitis, edema, pruritus and pain                                  | Low                                 | 100                                                                        | All patients underwent breast-sparing surgery<br><br>Cup size was based on patients' bra size. If required, checked by fitting bra models | Prone breast board (Orfit, Wijnegem, Belgium)<br><br>Simple prone treatment resulted in significantly less skin toxicity compared to a more sophisticated technique in supine position                                                                                                                                                                                                 | Both hands holding the hand grip (based on image only, not described)                                              | Not described                                 |
| Kirby et al. A randomised trial of Supine versus Prone breast radiotherapy (SuPr study): Comparing set-up errors and respiratory motion. Radiotherapy and Oncology 2011;100:221–6.           | Non-blinded, randomized mono-centric trial<br><br>Aim: Test a prone position against the international standard supine position in terms of feasibility, set-up errors and respiratory motion | Low to moderate                     | 26                                                                         | All patients treated with WBI after breast conserving surgery<br><br>Only patients of breast cup-size PC (UK) were recruited              | Supine: breast board (Civco, IA, USA)<br><br>Prone: in-house-designed, with a styrofoam/memory foam mattress<br><br>Patient comfort scores and treatment times: comparable<br><br>Prone reduces anterior chest wall motion with respiration. Set-up errors greater using prone. Larger CTV–PTV margins in prone. Further work needed before prone can become standard treatment option | Arms extended above the head in supports.<br><br>An adjustable arm-positioning device registrable to the couch top | Not described                                 |
| Varga et al. Individual Positioning: A Comparative Study of Adjuvant Breast Radiotherapy in the Prone Versus                                                                                 | Blinded, randomized mono-centric trial<br><br>Aim: Identify patients who benefit most from prone positioning by means of dosimetry and feasibility                                            | Low to moderate                     | 61<br><br>First study phase n= 20, radiotherapy planning performed in both | Early breast cancer patients after surgery requiring only radiotherapy of operated breast                                                 | Supine thorax and the prone breast modules of the AIO (All In One) Solution (ORFIT, Wijnegem, Belgium)<br><br>Supine: five-point fixation, breast precut (ORFIT)                                                                                                                                                                                                                       | Supine: both arms elevated                                                                                         | Supine: 15° elevated                          |

|                                                                                                                                                                                                         |                                                                                                                                                |                                     |                                                                                                                                             |                                                    |                                                                                                                                                                                                                                                                                                                                                                             |                                                |                                                |
|---------------------------------------------------------------------------------------------------------------------------------------------------------------------------------------------------------|------------------------------------------------------------------------------------------------------------------------------------------------|-------------------------------------|---------------------------------------------------------------------------------------------------------------------------------------------|----------------------------------------------------|-----------------------------------------------------------------------------------------------------------------------------------------------------------------------------------------------------------------------------------------------------------------------------------------------------------------------------------------------------------------------------|------------------------------------------------|------------------------------------------------|
| Supine Position. Int J Radiat Oncol Biol Phys 2009;75:94–100.                                                                                                                                           |                                                                                                                                                |                                     | positions, all patients treated in supine position<br><br>Second study phase: n= 41 patients randomized to radiotherapy in prone vs. supine | No restriction regarding size of breast or patient | Exposure of the ipsilateral lung, mean lung dose and V20Gy, lower in prone. Doses to the heart did not differ<br><br>Special attention to accurate repositioning necessary if prone is applied, and dose inhomogeneity and acute skin reactions may increase slightly                                                                                                       |                                                |                                                |
| Lin et al. Feasibility study of individualized optimal positioning selection for left-sided whole breast radiotherapy: DIBH or prone. J Appl Clin Med Phys 2018;19:218–29.                              | Prospective comparison study<br><br>Aim: Predict the optimal treatment position of left-side breast radiotherapy using anatomical features     | High                                | 16                                                                                                                                          | Left-sided breast cancer                           | Standard supine position in FB and gating DIBH: Sinmed Posiboard-2 (CivCo, IA, USA)<br><br>Prone position: Clear Vue Prone Position Breast Radiotherapy System (Orbital Therapy, Bedford, UK)<br><br>Feasible to predict the optimal treatment position using anatomical features extracted from supine free breathing CT scans with multiple machine learning models       | Not described                                  | Supine: 10° elevated                           |
| Kahán et al. A simple clinical method for predicting the benefit of prone vs. supine positioning in reducing heart exposure during left breast radiotherapy. Radiotherapy and Oncology 2018;126:487–92. | Prospective cohort study<br><br>Aim: Develop a validated model for the prediction of preferable treatment position in left breast radiotherapy | Single cohort study so not assessed | Model validated in 100 patients<br><br>External testing on a 28-case series<br><br>See also Varga et al.                                    | Postoperative left-sided breast radiotherapy       | Supine/prone position: described in doi: 10.1016/j.canrad.2016.05.014<br><br>About 20% of the cases, prone positioning during left breast radiotherapy increases the dose to the LAD or the heart.<br><br>Developed a simple clinical tool, based on patient's anatomical determinants, appropriate for assisting individual positioning aiming at maximum heart protection | described in doi: 10.1016/j.canrad.2016.05.014 | described in doi: 10.1016/j.canrad.2016.05.014 |

|                                                                                                                                                                                                                                |                                                                                                                                                                                       |                         |                          |                                                                                                                                                                                                        |                                                                                                                                                                                                                         |                                                                                                                              |                                                                  |
|--------------------------------------------------------------------------------------------------------------------------------------------------------------------------------------------------------------------------------|---------------------------------------------------------------------------------------------------------------------------------------------------------------------------------------|-------------------------|--------------------------|--------------------------------------------------------------------------------------------------------------------------------------------------------------------------------------------------------|-------------------------------------------------------------------------------------------------------------------------------------------------------------------------------------------------------------------------|------------------------------------------------------------------------------------------------------------------------------|------------------------------------------------------------------|
| <p>Yu et al. External-beam partial breast irradiation in a supine versus prone position after breast-conserving surgery for Chinese breast cancer patients. <i>Sci Rep</i> 2018;8.</p>                                         | <p>Prospective treatment planning comparison study</p> <p>Aim: Investigate differences in target volumes and dosimetric parameters between the supine and prone</p>                   | <p>High to moderate</p> | <p>30</p>                | <p>Chinese breast cancer patients</p> <p>External-beam partial breast irradiation (EB-PBI) after breast-conserving surgery</p>                                                                         | <p>Supine: MT350N (CIVCO, AI, USA)</p> <p>Prone: Horizon™ Prone Breast Bracket- MTHPBB01 (CIVCO, AI, USA)</p> <p>All OAR constraints met in both positions. Heart sparing best spared in supine. Lower dose in lung</p> | <p>Supine/Prone: arm support both arms above the head</p>                                                                    | <p>Supine/Prone: no tilt</p>                                     |
| <p>Krengli et al. Prone versus supine position for adjuvant breast radiotherapy: A prospective study in patients with pendulous breasts. <i>Radiation Oncology</i> 2013;8.</p>                                                 | <p>Prospective treatment planning comparison study</p> <p>Aim: Analyse dosimetric parameters in the prone versus supine position</p>                                                  | <p>High to moderate</p> | <p>55</p>                | <p>Patients with pendulous breasts treated after breast conserving surgery</p>                                                                                                                         | <p>Supine: breast Posiboard™ system (CIVCO, AI, USA)</p> <p>Prone: breast board Clear Vue™ (Orbital Therapy, Bedford, USA)</p> <p>Lower lung dose in prone position</p>                                                 | <p>Supine: not described</p> <p>Prone: both arms above the head, hands holding a handlebar to reduce body rotation</p>       | <p>Not described</p>                                             |
| <p>Bartlett et al. The UK HeartSpare Study (Stage IB): Randomised comparison of a voluntary breath-hold technique and prone radiotherapy after breast conserving surgery. <i>Radiotherapy and Oncology</i> 2015;114:66–72.</p> | <p>Single centre randomised non-blinded crossover study</p> <p>Aim: Compare OAR dose for supine voluntary deep-inspiratory breath-hold (VBH) and free-breathing prone techniques.</p> | <p>Low to moderate</p>  | <p>28 (34 recruited)</p> | <p>Patients with estimated breast volumes &gt;750 cm<sup>3</sup></p> <p>Whole breast irradiation. Receive one or other technique for fractions 1–7, before switching techniques for fractions 8–15</p> | <p>Supine: Not described</p> <p>Prone: AIO Solution prone breast board (Orfit, Wijnegem, Belgium)</p> <p>Supine VBH provided superior cardiac sparing and reproducibility than free-breathing prone position</p>        | <p>Supine: both arms up based on image only, not described</p> <p>Prone: both arms up based on image only, not described</p> | <p>Supine/prone: no tilt, based on image only, not described</p> |

|                                                                                                                                                          |                                                                                                                                                                            |                                            |                                         |                                                                                              |                                                                                                                                                                                                                                                                                                                                                                                      |                                                                                                   |                                                    |
|----------------------------------------------------------------------------------------------------------------------------------------------------------|----------------------------------------------------------------------------------------------------------------------------------------------------------------------------|--------------------------------------------|-----------------------------------------|----------------------------------------------------------------------------------------------|--------------------------------------------------------------------------------------------------------------------------------------------------------------------------------------------------------------------------------------------------------------------------------------------------------------------------------------------------------------------------------------|---------------------------------------------------------------------------------------------------|----------------------------------------------------|
| <p>Mitchell et al. Interfraction and Intrafraction Setup Variability for Prone Breast Radiation Therapy. Int J Radiat Oncol Biol Phys 2010;76:1571–7</p> | <p>Prospective cohort study<br/>Aim: Report the interfraction and intrafraction setup variation for prone breast radiotherapy</p>                                          | <p>Single cohort study so not assessed</p> | <p>10 (8 right-sided, 2 left-sided)</p> | <p>Patients treated after breast conserving surgery.</p>                                     | <p>Prone: New York University prone breast mattress<br/>Acceptable interfraction and intrafraction variability were demonstrated</p>                                                                                                                                                                                                                                                 | <p>Arms above the head holding a handlebar to reduce body rotation</p>                            | <p>No tilt, based on image only, not described</p> |
| <p>Buijsen et al. Prone breast irradiation for pendulous breasts. Radiotherapy and Oncology 2007;82:337–40</p>                                           | <p>Prospective treatment planning comparison study<br/>Aim: Quantify differences in doses in OARs of patients with pendulous breasts between prone and supine position</p> | <p>High</p>                                | <p>10 (3 right-sided, 7 left-sided)</p> | <p>Patients with pendulous breasts (bra size D and over) after breast conserving surgery</p> | <p>Supine: not described<br/>Prone: in-house developed device<br/>Prone: decrease in OAR dose; better homogeneity; worse PTV coverage; nodal treatment not possible</p>                                                                                                                                                                                                              | <p>Supine: both arms were placed above the head using an arm support<br/>Prone: Not described</p> | <p>Supine/Prone: not described</p>                 |
| <p>Huppert et al. The role of a prone setup in breast radiation therapy. Front Oncol 2011;1.</p>                                                         | <p>Overview article of experience with prone breast radiotherapy</p>                                                                                                       | <p>Not assessed</p>                        | <p>Not applicable</p>                   | <p>Not applicable</p>                                                                        | <p>Not applicable<br/>Experience of the New York University School of Medicine. Prone is:<br/>- advocated for women with large pendulous breasts<br/>- decreases acute and late toxicities<br/>- both feasible and reproducible<br/>- advantageous not only for women with larger breasts but in most patients since it reduces the inclusion of heart and lung within the field</p> | <p>Not applicable</p>                                                                             | <p>Not applicable</p>                              |

| <b>Bibliographic reference</b>                                                                                                                        | <b>Study type/ Design</b>                                                                                                                                                                   | <b>Study quality (risk of bias)</b> | <b>Sample size n=</b>                                       | <b>Participant characteristics</b>                                                                                                   | <b>Participant Positioning: prone/supine</b>                                                                                                                                                                   | <b>Participant Positioning: arms</b>                                                                                                                               | <b>Participant Positioning: flat/elevated</b> |
|-------------------------------------------------------------------------------------------------------------------------------------------------------|---------------------------------------------------------------------------------------------------------------------------------------------------------------------------------------------|-------------------------------------|-------------------------------------------------------------|--------------------------------------------------------------------------------------------------------------------------------------|----------------------------------------------------------------------------------------------------------------------------------------------------------------------------------------------------------------|--------------------------------------------------------------------------------------------------------------------------------------------------------------------|-----------------------------------------------|
| Csenki et al. Radiation dose to the nodal regions during prone versus supine breast irradiation. Ther Clin Risk Manag 2014;10:367–72.                 | Retrospective treatment planning comparison study<br><br>Aim: Analyse dose to nodal regions, axillary and IM nodes in prone or supine position                                              | Moderate                            | 100 consecutive patients                                    | See Varga et al 2009.<br><br>Nodal regions were retrospectively delineated                                                           | See Varga et al 2009.<br><br>Radiation dose to the axillary and IM lymph nodes mostly insufficient and is significantly lower in prone                                                                         | See Varga et al 2009.                                                                                                                                              | See Varga et al 2009.                         |
| Alonso-Basanta et al. Coverage of Axillary Lymph Nodes in Supine vs. Prone Breast Radiotherapy. Int J Radiat Oncol Biol Phys 2009;73:745–51.          | Prospective treatment planning comparison study<br><br>Aim: Compare axillary node coverage, whether a better target or sparing of normal tissue was feasible in prone                       | High to moderate                    | 20                                                          | Stage 0,I,II breast cancer, whole breast irradiation<br><br>Majority left-sided (12 of 20). 11 of 20 patients had smaller than C cup | Prone: No specific details<br><br>Supine: breast board (Civco, AI, USA)<br><br>Both positions: treatment of the nodal regions was inadequate.<br><br>Prone: worse target coverage. Enabled better lung sparing | Both arms elevated                                                                                                                                                 | Not described                                 |
| Deseyne et al. Whole breast and regional nodal irradiation in prone versus supine position in left sided breast cancer. Radiation Oncology 2017;12.   | Feasibility study<br><br>Aim: feasibility of whole-breast irradiation with lymph node irradiation in prone crawl position                                                                   | Feasibility study so not assessed   | 5                                                           | Left sided breast cancer patients with invasive carcinoma and pathologically confirmed positive lymph nodes                          | Supine: Posirest arm support (Civco, IA, USA)<br><br>Prone: crawl prone position, in-house developed board<br><br>Good target coverage, better sparing of OARs                                                 | Supine: both arms elevated above the head<br><br>Prone: arm at the treated side is positioned alongside the body, the arm at the contralateral side above the head | Supine/Prone: not described                   |
| Mulliez et al. Heart dose reduction by prone deep inspiration breath hold in left-sided breast irradiation. Radiotherapy and Oncology 2015;114:79–84. | Validation study<br><br>Aim: evaluates the heart sparing ability and feasibility of deep inspiration breath hold (DIBH) in the prone position for left-sided whole breast irradiation (WBI) | Validation study so not assessed    | 50<br><br>Explorative study: 12<br><br>Validation study: 38 | Breast conserving surgery                                                                                                            | Supine: Breast Step System (Elekta, Crawley, UK)<br><br>Prone: prone-lateral Horizon breast board (Civco, IA, USA)<br><br>Demonstrates the ability and feasibility of prone DIBH to                            | Supine/prone: Not described<br><br>DIBH supine and prone: Varian Real-time Position Management system (RPM™)                                                       | Supine/prone: Not described                   |

|                                                                                                                                                                                     |                                                                                                                                                                                               |                                     |         |                                                                                                          |                                                                                                                                                                                                                                                            |                                                                                                                                                                                                                                                                                                                                                                               |                       |
|-------------------------------------------------------------------------------------------------------------------------------------------------------------------------------------|-----------------------------------------------------------------------------------------------------------------------------------------------------------------------------------------------|-------------------------------------|---------|----------------------------------------------------------------------------------------------------------|------------------------------------------------------------------------------------------------------------------------------------------------------------------------------------------------------------------------------------------------------------|-------------------------------------------------------------------------------------------------------------------------------------------------------------------------------------------------------------------------------------------------------------------------------------------------------------------------------------------------------------------------------|-----------------------|
|                                                                                                                                                                                     |                                                                                                                                                                                               |                                     |         |                                                                                                          | acquire optimal heart and lung sparing for left-sided WBI                                                                                                                                                                                                  |                                                                                                                                                                                                                                                                                                                                                                               |                       |
| Boute et al. Potential benefits of crawl position for prone radiation therapy in breast cancer. J Appl Clin Med Phys 2017;18:200–5.                                                 | Single cohort study<br>Aim: evaluated a new prone position: crawl position                                                                                                                    | Single cohort study so not assessed | 9<br>10 | Volunteers<br><br>Patients, treated half of the fractions on both boards                                 | In-house developed prone crawl position board. And AIO breast board (Orfit, Wijnegem, Belgium)<br><br>Crawl breast board: sternal pain was reported less frequently and was less severe than standard prone breast board                                   | The arm at the treated side alongside the body and the arm at the contralateral side above the head<br><br>Positioned on AIO: discomfort caused by bilateral arm elevation; had to exert force by the arm at the operated side to maintain a stable position.<br><br>Crawl prototypes: ipsilateral arm support provides stability by preventing lateral and downward movement | No tilt was described |
| Shin et al. Breast, chest wall, and nodal irradiation with prone set-up: Results of a hypofractionated trial with a median follow-up of 35 months. Pract Radiat Oncol 2016;6:e81–8. | Phase 1-2 study<br>Aim: Primary: incidence of grade 2 acute skin toxicity<br>Secondary: feasibility of prone position, compliance with dosimetric constraints, and incidence of late toxicity | Phase 1-2 study so not assessed     | 69      | Stage IB-IIIa breast cancer<br><br>Underwent segmental or total mastectomy with 1-5 involved lymph nodes | Supine: not described<br><br>Prone: prone indexed breast board (no details). Head turned away from treatment side<br><br>Prone treatment is safe and well tolerated in this study. Longer follow-up is warranted for efficacy and late toxicity assessment | Supine: not described<br><br>Prone: both arms up, with hands holding the handle device, and ipsilateral upper arm positioned close to right angle.<br><br>Vac-Lok immobilization under the head and arms, and placement of a custom mouldable cushion under the head                                                                                                          | Not described         |

| <b>Bibliographic reference</b>                                                                                                                                                                             | <b>Study type/ Design</b>                                                                                  | <b>Study quality (risk of bias)</b> | <b>Sample size n=</b> | <b>Participant characteristics</b>                                                                                                               | <b>Participant Positioning: prone/supine/ lateral decubitus (LD)</b>                                                                                                                                                                                                                                                                                             | <b>Participant Positioning: arms</b>                                                                                            | <b>Participant Positioning: flat/elevated</b> |
|------------------------------------------------------------------------------------------------------------------------------------------------------------------------------------------------------------|------------------------------------------------------------------------------------------------------------|-------------------------------------|-----------------------|--------------------------------------------------------------------------------------------------------------------------------------------------|------------------------------------------------------------------------------------------------------------------------------------------------------------------------------------------------------------------------------------------------------------------------------------------------------------------------------------------------------------------|---------------------------------------------------------------------------------------------------------------------------------|-----------------------------------------------|
| Campana et al. Breast radiotherapy in the lateral decubitus position: A technique to prevent lung and heart irradiation. Int J Radiat Oncol Biol Phys 2005;61:1348–54                                      | Single cohort study<br>Aim: present this isocentric technique and discuss its advantages and disadvantages | Single cohort study so not assessed | 26-37                 | Large breasted patients<br>(non-isocentric technique already used in 500 patients)                                                               | Dedicated board, (Techset, no further information) with a back rest. Large elastic fabric band to move contralateral breast out of radiation fields. Thin carbon fiber breast rest placed under the breast.<br><br>Different shapes and sizes of breast disposers.<br><br>Isocentric breast irradiation in lateral decubitus position is simple and reproducible | On dorsal support: vertical pole shaft is mounted to place the contralateral arm to ensure maximum comfort and minimum mobility | No tilt: based on image only, not described   |
| Kirova et al. Whole breast radiotherapy in the lateral decubitus position: A dosimetric and clinical solution to decrease the doses to the organs at risk (OAR). Radiotherapy and Oncology 2014;110:477–81 | Single cohort study<br>Aim: Evaluate WBRT in lateral position and report acute toxicities                  | Single cohort study so not assessed | 56                    | Early-stage breast cancer, whole breast irradiation                                                                                              | See Campana et al. 2005<br><br>Excellent dosimetric profile, low doses to the heart and ipsilateral lung. Very well tolerated; good acute toxicity profile                                                                                                                                                                                                       | See Campana et al. 2005                                                                                                         | See Campana et al. 2005                       |
| Bronsart et al. Whole breast radiotherapy in the lateral isocentric lateral decubitus position: Long-term efficacy and toxicity results. Radiotherapy and                                                  | Single cohort study<br>Aim: analyze acute toxicity as well as late pulmonary and cardiac toxicity          | Single cohort study so not assessed | 832                   | All patients with large pendulous breasts, pectus excavatum, elderly, heavy smokers<br>Decision to propose this technique was taken by senior RO | See Campana et al. 2005<br><br>Position well tolerated. Considerable reduction of doses to OARs; very good acute toxicity profile                                                                                                                                                                                                                                | See Campana et al. 2005<br><br>Ipsilateral arm placed under the head                                                            | See Campana et al. 2005                       |

|                                                                                                                                                                                                 |                                                                                                                    |                                     |                       |                                                                                     |                                                                                                                                                                                                                                                                               |                                                                                                                                                                                                                                   |                                               |
|-------------------------------------------------------------------------------------------------------------------------------------------------------------------------------------------------|--------------------------------------------------------------------------------------------------------------------|-------------------------------------|-----------------------|-------------------------------------------------------------------------------------|-------------------------------------------------------------------------------------------------------------------------------------------------------------------------------------------------------------------------------------------------------------------------------|-----------------------------------------------------------------------------------------------------------------------------------------------------------------------------------------------------------------------------------|-----------------------------------------------|
| Oncology<br>2017;124:214–9.                                                                                                                                                                     |                                                                                                                    |                                     |                       |                                                                                     |                                                                                                                                                                                                                                                                               |                                                                                                                                                                                                                                   |                                               |
| Krhili et al. Whole breast radiotherapy in the isocentric lateral decubitus position: Role of the immobilization device and table on clinical results. Cancer Radiother. 2019 Jun;23(3):209-215 | Single cohort study<br><br>Aim: Evaluate clinical results and “bolus effect” based on the table design             | Single cohort study so not assessed | 248                   | Early-stage breast cancer, whole breast irradiation                                 | See Campana et al. 2005<br><br>The position is well tolerated. Clinical results comparable to different modalities                                                                                                                                                            | See Campana et al. 2005                                                                                                                                                                                                           | See Campana et al. 2005                       |
| Davidson et al. Dosimetric impact of setup accuracy for an electron breast boost technique. Pract Radiat Oncol. 2015;5(5):e499-e504.                                                            | Single cohort study<br><br>Aim: Determine the setup error on an electron breast boost technique using daily CBCT   | Single cohort study so not assessed | 33                    | Post segmental-mastectomy patients                                                  | Modified lateral decubitus position<br><br>Vac-lok bag (Civco, Orange City, IA, USA) indexed to the bed.<br><br>In-house compression device used to reduce distance to tumour bed (n=25 cases)<br><br>Not clear that any of the factors studied influenced the setup accuracy | Not described                                                                                                                                                                                                                     | Lateral decubitus position                    |
| <b>Bibliographic reference</b>                                                                                                                                                                  | <b>Study type/ Design</b>                                                                                          | <b>Study quality (risk of bias)</b> | <b>Sample size n=</b> | <b>Participant characteristics</b>                                                  | <b>Participant Positioning: prone/supine/lateral decubitus</b>                                                                                                                                                                                                                | <b>Participant Positioning: arms</b>                                                                                                                                                                                              | <b>Participant Positioning: flat/elevated</b> |
| Goldsworthy et al. Abducting both arms improves stability during breast radiotherapy: The Bi Arm study in radiotherapy. J                                                                       | Randomised study<br><br>Aim: Is bilateral arm abduction superior to unilateral abduction with respect to stability | Low to moderate                     | 50                    | Consecutive breast cancer patients<br><br>Whole breast irradiation after lumpectomy | Supine: no information of the positioning device available                                                                                                                                                                                                                    | Reduction in systematic error and inter-patient variability shows that bilateral arm abduction is a more stable and reproducible position than unilateral arm abduction<br><br>The CCD translational data indicates that patients | Elevation based on image only, not described  |



|                                                                                                                                                                                                                 |                                                                                                                                    |                  |    |                                                                                                                                       |                                                            |                                                                                                                                                                                                                                              |                                                                                                  |
|-----------------------------------------------------------------------------------------------------------------------------------------------------------------------------------------------------------------|------------------------------------------------------------------------------------------------------------------------------------|------------------|----|---------------------------------------------------------------------------------------------------------------------------------------|------------------------------------------------------------|----------------------------------------------------------------------------------------------------------------------------------------------------------------------------------------------------------------------------------------------|--------------------------------------------------------------------------------------------------|
| Radiother Pract<br>2011;10:250–9.                                                                                                                                                                               |                                                                                                                                    |                  |    |                                                                                                                                       |                                                            | treated with unilateral arm abduction were moving inferiorly on the breast board                                                                                                                                                             |                                                                                                  |
| Graham et al.<br>Armrest versus vacuum bag immobilization in the treatment of breast cancer by radiation therapy: A randomized comparison.<br>Australas Radiol<br>2000;44:193–7.                                | Randomised study<br><br>Aim: Determine relative advantages /disadvantages of Armrest (ARI) versus vacuum bag immobilization (VACI) | Low to moderate  | 30 | Radiotherapy to the breast or chest wall with or without regional nodal radiotherapy                                                  | Supine: no information of the positioning device available | Patients were randomized at simulation initially to the ARI or VACI technique. And randomized to be treated in either ARI or VACI<br><br>Both immobilization techniques are acceptable. Stability is equal                                   | Some patients had a rigid incline board or wedge placed under the mattress at the upper body end |
| Xiang et al. Which technique of positioning and immobilization is better for breast cancer patients in postmastectomy IMRT, single-pole or double-pole immobilization? J Appl Clin Med Phys<br>2019; 20:168–74. | Retrospective comparison study<br><br>Aim: Single pole vs double pole: which position is more suitable for clinical practice       | High to moderate | 94 | Whole breast irradiation after lumpectomy<br><br>Single pole to ipsilateral side (both hands on single pole) = 54<br>Double pole = 40 | Supine: breast bracket (no further information)            | Both arms extended above their head. Head turned to contralateral side.<br><br>Single-pole position seems more comfortable. Both devices could allow for reproducible setup and acceptable dosimetry.                                        | Breast bracket with elevation based on image only, not described<br><br>5 mm thermoplastic mould |
| Saito et al.<br>Differences between current and historical breast cancer axillary lymph node irradiation based on arm position: Implications for radiation oncologists.<br>American Journal of                  | Prospective comparison study<br><br>Aim: Identify differences in regional node irradiation between 2 arm positions                 | High             | 16 | Regional irradiation after lumpectomy or mastectomy                                                                                   | Supine: no information of the positioning device available | Scanned in 2 arm positions:<br>- historical position (HP) ipsilateral arm is at 90 degrees to the body axis.<br>- both arms above the head; handgrips; customized vacuum-lock mold (CT-P)<br><br>Coverage of the axillary lymph nodes varies | Flat, based on image only, not described                                                         |

|                                                                                                                                                                                                                             |                                                                                                                                                                                |                                     |                       |                                                                                                                                  |                                                                |                                                                                                                                                                                                                                                                                                                                                                                         |                                                                                                                                                                                            |
|-----------------------------------------------------------------------------------------------------------------------------------------------------------------------------------------------------------------------------|--------------------------------------------------------------------------------------------------------------------------------------------------------------------------------|-------------------------------------|-----------------------|----------------------------------------------------------------------------------------------------------------------------------|----------------------------------------------------------------|-----------------------------------------------------------------------------------------------------------------------------------------------------------------------------------------------------------------------------------------------------------------------------------------------------------------------------------------------------------------------------------------|--------------------------------------------------------------------------------------------------------------------------------------------------------------------------------------------|
| Clinical Oncology: Cancer Clinical Trials 2009;32:381–6.                                                                                                                                                                    |                                                                                                                                                                                |                                     |                       |                                                                                                                                  |                                                                | significantly with arm position                                                                                                                                                                                                                                                                                                                                                         |                                                                                                                                                                                            |
| Kapanen et al. Residual position errors of lymph node surrogates in breast cancer adjuvant radiotherapy: Comparison of two arm fixation devices and the effect of arm position correction. Medical Dosimetry 2016;41:47–52. | Retrospective study comparing patients in two different arm positions<br><br>Aim: Investigate residual setup errors of nodal regions and irradiated volume of the Humeral head | High to moderate                    | 113                   | Left breast cancer<br><br>Post-breast conserving surgery<br><br>Standard wrist-hold (WH) =53<br><br>House-made rod-hold (RH)= 60 | Supine                                                         | Both arms extended above their head.<br><br>Standard wrist-hold (WH) (Candor ConBine fixation device (Candor, Gislev, Denmark) vs House-made rod-hold (RH)<br><br>Irradiated volumes of humeral head for RH were around 2 times larger than with WH<br><br>Daily image guidance recommended because of large random position errors obtained for the arm position with both the devices | Elevation based on image only, not described                                                                                                                                               |
| <b>Bibliographic reference</b>                                                                                                                                                                                              | <b>Study type/ Design</b>                                                                                                                                                      | <b>Study quality (risk of bias)</b> | <b>Sample size n=</b> | <b>Participant characteristics</b>                                                                                               | <b>Participant Positioning: prone/supine/lateral decubitus</b> | <b>Participant Positioning: arms</b>                                                                                                                                                                                                                                                                                                                                                    | <b>Participant Positioning: flat/elevated</b>                                                                                                                                              |
| Roos et al. Van wig naar plat: wat is het effect op de dosis in het normale weefsel bij borstsparende bestraling. Gamma Professional 2013;63:22–5                                                                           | Prospective comparison study<br><br>Aim: OAR dose differences between flat and elevated positioning                                                                            | High                                | 10                    | Left-sided breast cancer<br><br>Whole breast irradiation after lumpectomy                                                        | Supine                                                         | Both arms up                                                                                                                                                                                                                                                                                                                                                                            | Elevated: Posiboard-2 Breastboard positioned in 15°. Flat: Posirest-2 arm board (Civco, Orange City, IA, USA)<br><br>Flat position: PTV moves cranially. Dose outside the PTV in the nodal |

|                                                                                                                                                                             |                                                                                                                                                                   |                                     |                                                                                                                          |                                                                                                      |                                                                                                                                                                                                                                                                                                                                             |                                                                                                                                                               |                                                                                                                                                                                                                                                                            |
|-----------------------------------------------------------------------------------------------------------------------------------------------------------------------------|-------------------------------------------------------------------------------------------------------------------------------------------------------------------|-------------------------------------|--------------------------------------------------------------------------------------------------------------------------|------------------------------------------------------------------------------------------------------|---------------------------------------------------------------------------------------------------------------------------------------------------------------------------------------------------------------------------------------------------------------------------------------------------------------------------------------------|---------------------------------------------------------------------------------------------------------------------------------------------------------------|----------------------------------------------------------------------------------------------------------------------------------------------------------------------------------------------------------------------------------------------------------------------------|
|                                                                                                                                                                             |                                                                                                                                                                   |                                     |                                                                                                                          |                                                                                                      |                                                                                                                                                                                                                                                                                                                                             |                                                                                                                                                               | area, elevated position: 30Gy vs flat position: 23Gy                                                                                                                                                                                                                       |
| Jain et al. Inter-fraction motion and dosimetric consequences during breast intensity-modulated radiotherapy (IMRT). Radiotherapy and Oncology 2009;90:93–8.                | Prospective, observational imaging study<br><br>Aim: Inter-fraction motion during breast IMRT assed by CBCT imaging                                               | Single cohort study so not assessed | 10                                                                                                                       | Eight Large breast size (PD cup) (n=8)<br><br>Heart (>5 mm) in the predicted irradiated volume (n=2) | Supine                                                                                                                                                                                                                                                                                                                                      | Arm affected side elevated in the attached forearm immobilization device                                                                                      | Elevated: MedTec (Orange City, IA, USA) breastboard inclined at an angle of 10–25°<br><br>All longitudinal shifts: towards the feet. Patients moved down the inclined treatment couch compared with planning position. Use of a footrest may prevent some of this movement |
| Veldeman et al. Preliminary results on setup precision of prone-lateral patient positioning for whole breast irradiation. Int J Radiat Oncol Biol Phys. 2010;1;78(1):111-8. | Prospective comparison study<br><br>Aim: Develop a rapid and reproducible technique for prone positioning and to compare dose–volume indices in prone and supine. | High                                | 18<br><br>(Experience in 8 patients, thereafter modifications on breast board. Then performed in additional 10 patients) | Whole breast irradiation after breast conserving surgery                                             | Supine: not described<br><br>Prone: Horizon breast board (Civco Medical Solutions, AI, USA)<br><br>Developed a prone-lateral (rather than a pure prone) positioning technique. Dose–volume indices show the ability of prone radiotherapy to spare the lung and heart. The setup precision is comparable to supine setup data in literature | Supine: not described<br><br>Prone: Both upper arms are placed laterally from the head-shoulder support; the lower arms and hands embrace its cranial surface | Supine: not described<br><br>Prone: incline of the wedge causes a slight roll of the thorax to a prone-lateral rather than a prone position.                                                                                                                               |

|                                                                                                                                                                                                         |                                                                                                                                                                                    |                                            |                                         |                                                                                                         |                                                                                                                                                                                                                                                                                                                                                                                                        |                                                                                  |                                    |
|---------------------------------------------------------------------------------------------------------------------------------------------------------------------------------------------------------|------------------------------------------------------------------------------------------------------------------------------------------------------------------------------------|--------------------------------------------|-----------------------------------------|---------------------------------------------------------------------------------------------------------|--------------------------------------------------------------------------------------------------------------------------------------------------------------------------------------------------------------------------------------------------------------------------------------------------------------------------------------------------------------------------------------------------------|----------------------------------------------------------------------------------|------------------------------------|
| <p>Veldeman et al. Alternated prone and supine whole-breast irradiation using IMRT: setup precision, respiratory movement and treatment time. Int J Radiat Oncol Biol Phys. 2012; 1;82(5):2055-64.</p>  | <p>Prospective comparison study<br/>Aim: Compare setup precision, respiration-related breast movement and treatment time between prone and supine for whole-breast irradiation</p> | <p>High</p>                                | <p>10 (6 left-sided; 4 right-sided)</p> | <p>Early-stage breast cancer</p>                                                                        | <p>Supine: Posirest support with a cranial and two adjustable lateral arm supports (Civco Medical Solutions, IA, USA)<br/><br/>Prone: modified Horizon breast board (Civco Medical Solutions, IA, USA)<br/><br/>Setup precision between prone and supine showed no significant differences in random and systematic errors. Respiratory movement smaller in prone. Longer treatment times in prone</p> | <p>Supine/prone: Not described</p>                                               | <p>Supine/prone: Not described</p> |
| <p>Jozsef et al. Prospective study of cone-beam computed tomography image-guided radiotherapy for prone accelerated partial breast irradiation. Int J Radiat Oncol Biol Phys. 2011; 1;81(2):568-74.</p> | <p>Single Cohort study<br/>Aim: Report setup variations during prone accelerated partial breast irradiation</p>                                                                    | <p>Single Cohort study so not assessed</p> | <p>70 consecutive patients</p>          | <p>pT1 breast cancer patients</p>                                                                       | <p>Prone: dedicated mattress developed at NYU<br/><br/>The interfraction variations detected are comparable to those reported for APBI with a supine setup</p>                                                                                                                                                                                                                                         | <p>Arms above the head and hands holding a handlebar to reduce body rotation</p> | <p>Not described</p>               |
| <p>Kim et al. Evaluation of the anatomical parameters for normal tissue sparing in the prone position radiotherapy with small sized left breasts. Oncotarget.</p>                                       | <p>Prospective comparison study<br/>Aim: Is there a relationship between irradiated normal tissue volume and the chest wall shape rather than the breast shape and volume</p>      | <p>High</p>                                | <p>21</p>                               | <p>Patients with stage 0/1A left breast cancer with a breast volume of less than 750 cm<sup>3</sup></p> | <p>Supine: Not described<br/><br/>Prone: prone breast support (kVue™ Access 360™, Qfix, Avondale, USA).<br/><br/>Objective anatomical parameters related chest wall shape predict decrease in irradiated heart volume in prone position</p>                                                                                                                                                            | <p>Supine/prone: Not described</p>                                               | <p>Supine/prone: Not described</p> |

|                                                                                                                                                  |                                                                                                                                                                                                                    |                  |    |                                                                                                                                                                                          |                                                                                                                                                                                                                                                                                                                                                                                          |                                                                                                                       |                                                                                                                                                                                                                                      |
|--------------------------------------------------------------------------------------------------------------------------------------------------|--------------------------------------------------------------------------------------------------------------------------------------------------------------------------------------------------------------------|------------------|----|------------------------------------------------------------------------------------------------------------------------------------------------------------------------------------------|------------------------------------------------------------------------------------------------------------------------------------------------------------------------------------------------------------------------------------------------------------------------------------------------------------------------------------------------------------------------------------------|-----------------------------------------------------------------------------------------------------------------------|--------------------------------------------------------------------------------------------------------------------------------------------------------------------------------------------------------------------------------------|
| 2016;7(44):72211-72218.                                                                                                                          |                                                                                                                                                                                                                    |                  |    |                                                                                                                                                                                          |                                                                                                                                                                                                                                                                                                                                                                                          |                                                                                                                       |                                                                                                                                                                                                                                      |
| Kannan et al. Is there an advantage to delivering breast boost in the lateral decubitus position? Radiat Oncol. 2012;24;7:163.                   | Retrospective comparison study<br><br>Aim: Compare change in depth of target volume and dosimetric parameters between supine and lateral decubitus positions for breast boost treatment with electron beam therapy | High to moderate | 45 | Whole breast irradiation followed by tumour bed boost                                                                                                                                    | Supine: Not described<br><br>Lateral decubitus position (LDP): re-simulated for the boost treatment. Positioned in a customized vacuum bag.<br><br>Lateral decubitus position for breast boost treatment resulted in decreasing the maximum distance from the skin to surgical bed. Which facilitated the use of lower electron energies and decreased maximal dose to the target volume | Supine/LDP: Not described                                                                                             | Supine/LDP: Not described                                                                                                                                                                                                            |
| Ramella et al. Whole-breast irradiation: a subgroup analysis of criteria to stratify for prone position treatment. Med Dosim. 2012;37(2):186-91. | Prospective comparison study<br><br>Aim: Dosimetric comparison supine and prone position to eventually select subgroups of patients according to breast size who may benefit from prone                            | High             | 38 | Early-stage breast cancer patients<br><br>Grouped according to target volume (TV) measured in supine position:<br><br>small (400 mL) n=12, medium (400–700 mL) n=16, large (700 ml) n=10 | Supine: standard breast board device<br><br>Prone: device that was designed and built ad hoc. The system consists of a flat, wood platform with a double slope and an aperture.<br><br>Evidence of dosimetric benefit (lung) in all patient subgroups. Non-significant in subgroup "small"                                                                                               | Supine: Not described<br><br>Prone: Handlebars that patients must grip steadily, patients extend their arms overhead. | Supine: Not described<br><br>Prone: The platform is 76 cm long and 45 cm wide and has a single slope 17° in the lateral direction. The device allows having a lateral slope in both the directions, left to right and right to left. |

**Note: The papers that were selected based on the title and after reading were not used in the guideline are greyed out in the evidence table.**

## REFERENCES

### Supine vs prone: whole breast irradiation

1. Mulliez T, Veldeman L, van Greveling A, Speleers B, Sadeghi S, Berwouts D, et al. Hypofractionated whole breast irradiation for patients with large breasts: A randomized trial comparing prone and supine positions. *Radiotherapy and Oncology* 2013;108:203–8. [doi:10.1016/j.radonc.2013.08.040](https://doi.org/10.1016/j.radonc.2013.08.040).
2. Kirby AM, Evans PM, Helyer SJ, Donovan EM, Convery HM, Yarnold JR. A randomised trial of Supine versus Prone breast radiotherapy (SuPr study): Comparing set-up errors and respiratory motion. *Radiotherapy and Oncology* 2011;100:221–6. [doi:10.1016/j.radonc.2010.11.005](https://doi.org/10.1016/j.radonc.2010.11.005).
3. Varga Z, Hideghéty K, Mezo T, Nikolényi A, Thurzó L, Kahán Z. Individual Positioning: A Comparative Study of Adjuvant Breast Radiotherapy in the Prone Versus Supine Position. *Int J Radiat Oncol Biol Phys* 2009;75:94–100. [doi:10.1016/j.ijrobp.2008.10.045](https://doi.org/10.1016/j.ijrobp.2008.10.045).
4. Lin H, Liu T, Shi C, Petillion S, Kindts I, Weltens C, et al. Feasibility study of individualized optimal positioning selection for left-sided whole breast radiotherapy: DIBH or prone. *J Appl Clin Med Phys* 2018;19:218–29. [doi:10.1002/acm2.12283](https://doi.org/10.1002/acm2.12283).
5. Kahán Z, Rárosi F, Gaál S, Cserhádi A, Boda K, Darázs B, et al. A simple clinical method for predicting the benefit of prone vs. supine positioning in reducing heart exposure during left breast radiotherapy. *Radiotherapy and Oncology* 2018;126:487–92. [doi:10.1016/j.radonc.2017.12.021](https://doi.org/10.1016/j.radonc.2017.12.021).
6. Yu T, Xu M, Sun T, Shao Q, Zhang YJ, Liu XJ, et al. External-beam partial breast irradiation in a supine versus prone position after breast-conserving surgery for Chinese breast cancer patients. *Sci Rep* 2018;8. [doi:10.1038/s41598-018-33741-z](https://doi.org/10.1038/s41598-018-33741-z).
7. Krengli M, Masini L, Caltavuturo T, Pisani C, Apicella G, Negri E, et al. Prone versus supine position for adjuvant breast radiotherapy: A prospective study in patients with pendulous breasts. *Radiation Oncology* 2013;8. [doi:10.1186/1748-717X-8-232](https://doi.org/10.1186/1748-717X-8-232).
8. Bartlett FR, Colgan RM, Donovan EM, McNair HA, Carr K, Evans PM, et al. The UK HeartSpare Study (Stage IB): Randomised comparison of a voluntary breath-hold technique and prone radiotherapy after breast conserving surgery. *Radiotherapy and Oncology* 2015;114:66–72. [doi:10.1016/j.radonc.2014.11.018](https://doi.org/10.1016/j.radonc.2014.11.018).
9. Mitchell J, Formenti SC, DeWyngaert JK. Interfraction and Intrafraction Setup Variability for Prone Breast Radiation Therapy. *Int J Radiat Oncol Biol Phys* 2010;76:1571–7. [doi:10.1016/j.ijrobp.2009.07.1683](https://doi.org/10.1016/j.ijrobp.2009.07.1683).
10. Buijsen J, Jager JJ, Bovendeerd J, Voncken R, Borger JH, Boersma LJ, et al. Prone breast irradiation for pendulous breasts. *Radiotherapy and Oncology* 2007;82:337–40. [doi:10.1016/j.radonc.2006.08.014](https://doi.org/10.1016/j.radonc.2006.08.014).
11. Huppert N, Jozsef G, DeWyngaert K, Formenti SC. The role of a prone setup in breast radiation therapy. *Front Oncol* 2011;1. [doi:10.3389/fonc.2011.00031](https://doi.org/10.3389/fonc.2011.00031).

### REFERENCE Supine vs prone: loco-regional treatment

1. Csenki M, Újhidy D, Cserhádi A, Kahán Z, Varga Z. Radiation dose to the nodal regions during prone versus supine breast irradiation. *Ther Clin Risk Manag* 2014;10:367–72. [doi:10.2147/TCRM.S59483](https://doi.org/10.2147/TCRM.S59483).
2. Alonso-Basanta M, Ko J, Babcock M, Dewyngaert JK, Formenti SC. Coverage of Axillary Lymph Nodes in Supine vs. Prone Breast Radiotherapy. *Int J Radiat Oncol Biol Phys* 2009;73:745–51. [doi:10.1016/j.ijrobp.2008.04.040](https://doi.org/10.1016/j.ijrobp.2008.04.040).
3. Deseyne P, Speleers B, de Neve W, Boute B, Paelinck L, Hoof T van, et al. Whole breast and regional nodal irradiation in prone versus supine position in left sided breast cancer. *Radiation Oncology* 2017;12. [doi:10.1186/s13014-017-0828-6](https://doi.org/10.1186/s13014-017-0828-6).
4. Mulliez T, Veldeman L, Speleers B, Mahjoubi K, Remouchamps V, van Greveling A, et al. Heart dose reduction by prone deep inspiration breath hold in left-sided breast irradiation. *Radiotherapy and Oncology* 2015;114:79–84. [doi:10.1016/j.radonc.2014.11.038](https://doi.org/10.1016/j.radonc.2014.11.038).
5. Boute B, de Neve W, Speleers B, van Greveling A, Monten C, van Hoof T v., et al. Potential benefits of crawl position for prone radiation therapy in breast cancer. *J Appl Clin Med Phys* 2017;18:200–5. [doi:10.1002/acm2.12118](https://doi.org/10.1002/acm2.12118).
6. Shin SM, No HS, Vega RM, Fenton-Kerimian M, Maisonet O, Hitchen C, et al. Breast, chest wall, and nodal irradiation with prone set-up: Results of a hypofractionated trial with a median follow-up of 35 months. *Pract Radiat Oncol* 2016;6:e81–8. [doi:10.1016/j.prro.2015.10.022](https://doi.org/10.1016/j.prro.2015.10.022).

### REFERENCE Lateral decubitus position

1. Campana F, Kirova YM, Rosenwald JC, Dendale R, Vilcoq JR, Dreyfus H, Fourquet A. Breast radiotherapy in the lateral decubitus position: A technique to prevent lung and heart irradiation. *Int J Radiat Oncol Biol Phys* 2005;61:1348–54. [doi:10.1016/j.ijrobp.2004.08.051](https://doi.org/10.1016/j.ijrobp.2004.08.051)
2. Kirova YM, Hijal T, Campana F, Fournier-Bidoz N, Stihlhart A, Dendale R, Fourquet A. Whole breast radiotherapy in the lateral decubitus position: a dosimetric and clinical solution to decrease the doses to the organs at risk (OAR). *Radiother Oncol.* 2014 Mar;110(3):477-81. [doi: 10.1016/j.radonc.2013.10.038](https://doi.org/10.1016/j.radonc.2013.10.038)
3. Bronsart E, Dureau S, Xu HP, Bazire L, Chilles A, Costa E, Logerot C, Falcou MC, Campana F, Berger F, Fourquet A, Kirova YM. Whole breast radiotherapy in the lateral isocentric lateral decubitus position: Long-term efficacy and toxicity results. *Radiother Oncol.* 2017 Aug;124(2):214-219. [doi:10.1016/j.radonc.2017.07.001](https://doi.org/10.1016/j.radonc.2017.07.001).
4. Krhili S, Costa E, Xu HP, Kirova YM. Whole breast radiotherapy in the isocentric lateral decubitus position: Role of the immobilization device and table on clinical results. *Cancer Radiother.* 2019 Jun;23(3):209-215. [doi: 10.1016/j.canrad.2018.09.001](https://doi.org/10.1016/j.canrad.2018.09.001).
5. Davidson S, Kirsner S, Mason B, Kisling K, Barrett RD, Bonetati A, Ballo M. Dosimetric impact of setup accuracy for an electron breast boost technique. *Pract Radiat Oncol.* 2015;5(5):e499-e504.

## REFERENCE Arm position

1. Goldsworthy SGS, Sinclair NSN, Tremlett JTJ, Chalmers ACA, Francis MFM, Simcock RSR. Abducting both arms improves stability during breast radiotherapy: The Bi Arm study in radiotherapy. *J Radiother Pract* 2011;10:250–9. doi:[10.1017/S1460396910000452](https://doi.org/10.1017/S1460396910000452).
2. Graham P, Elomari F, Brownde L. Armrest versus vacuum bag immobilization in the treatment of breast cancer by radiation therapy: A randomized comparison. *Australas Radiol* 2000;44:193–7. doi: [10.1046/j.1440-1673.2000.00804.x](https://doi.org/10.1046/j.1440-1673.2000.00804.x).
3. Xiang Q, Jie W, Zhu KK, Wang Q, Cheng J. Which technique of positioning and immobilization is better for breast cancer patients in postmastectomy IMRT, single-pole or double-pole immobilization? *J Appl Clin Med Phys* 2019;20:168–74. doi:[10.1002/acm2.12506](https://doi.org/10.1002/acm2.12506).
4. Saito AI, Vargas C, Morris CG, Lightsey J, Mendenhall NP. Differences between current and historical breast cancer axillary lymph node irradiation based on arm position: Implications for radiation oncologists. *American Journal of Clinical Oncology: Cancer Clinical Trials* 2009;32:381–6. doi:[10.1097/COC.0b013e318191718d](https://doi.org/10.1097/COC.0b013e318191718d).
5. Kapanen M, Laaksomaa M, Skyttä T, Haltamo M, Pehkonen J, Lehtonen T, Kellokumpu-Lethinen P, Hyödynmaa S Residual position errors of lymph node surrogates in breast cancer adjuvant radiotherapy: Comparison of two arm fixation devices and the effect of arm position correction. *Medical Dosimetry* 2016;41:47–52. doi:[10.1016/j.meddos.2015.08.001](https://doi.org/10.1016/j.meddos.2015.08.001).

## REFERENCE Flat vs elevated

1. Roos J, Mast M, Petoukhova A, Struikmans H. Van wig naar plat: wat is het effect op de dosis in het normale weefsel bij borstsparende bestraling. *Gamma Professional*. 2013, January, 63(1): 22-25.
2. Jain P, Marchant T, Green M, Watkins G, Davies J, McCarthy C, Lancaster J, Stewart A, Magee B, Moore C, Price P. Inter-fraction motion and dosimetric consequences during breast intensity-modulated radiotherapy (IMRT) *Radiother Oncol* 2009;90:93-8. doi:[10.1016/j.radonc.2008.10.010](https://doi.org/10.1016/j.radonc.2008.10.010)

## The papers that were selected based on the title and after reading were not used in the guideline are greyed out in the evidence table.

1. Veldeman L, Speleers B, Bakker M, Jacobs F, Coghe M, De Gerssem W, Impens A, Nechelput S, De Wagter C, Van den Broecke R, Villeirs G, De Neve W. Preliminary results on setup precision of prone-lateral patient positioning for whole breast irradiation. *Int J Radiat Oncol Biol Phys*. 2010 Sep 1;78(1):111-8. doi: [10.1016/j.ijrobp.2009.07.1749](https://doi.org/10.1016/j.ijrobp.2009.07.1749).
2. Veldeman L, De Gerssem W, Speleers B, Truyens B, Van Greveling A, Van den Broecke R, De Neve W. Alternated prone and supine whole-breast irradiation using IMRT: setup precision, respiratory movement and treatment time. *Int J Radiat Oncol Biol Phys*. 2012 Apr 1;82(5):2055-64. doi: [10.1016/j.ijrobp.2010.10.070](https://doi.org/10.1016/j.ijrobp.2010.10.070).
3. Jozsef G, DeWyngaert JK, Becker SJ, Lymberis S, Formenti SC. Prospective study of cone-beam computed tomography image-guided radiotherapy for prone accelerated partial breast irradiation. *Int J Radiat Oncol Biol Phys*. 2011 Oct 1;81(2):568-74. doi: [10.1016/j.ijrobp.2010.11.029](https://doi.org/10.1016/j.ijrobp.2010.11.029)
4. Kim H, Kim J. Evaluation of the anatomical parameters for normal tissue sparing in the prone position radiotherapy with small sized left breasts. *Oncotarget*. 2016 Nov 1;7(44):72211-72218. doi: [10.18632/oncotarget.12662](https://doi.org/10.18632/oncotarget.12662)
5. Kannan N, Kabolizadeh P, Kim H, Houser C, Beriwal S. Is there an advantage to delivering breast boost in the lateral decubitus position? *Radiat Oncol*. 2012 Sep 24;7:163. doi: [10.1186/1748-717X-7-163](https://doi.org/10.1186/1748-717X-7-163).
6. Ramella S, Trodella L, Ippolito E, Fiore M, Cellini F, Stimato G, Gaudino D, Greco C, Ramponi S, Cammilluzzi E, Cesarini C, Piermattei A, Cesario A, D'Angelillo RM. Whole-breast irradiation: a subgroup analysis of criteria to stratify for prone position treatment. *Med Dosim*. 2012 Summer;37(2):186-91. doi: [10.1016/j.meddos.2011.06.010](https://doi.org/10.1016/j.meddos.2011.06.010)
