# Supplementary material for: ESTRO-ACROP guideline for positioning, immobilisation and setup verification for local and loco-regional photon breast cancer irradiation
Source: PubMed Central journal article supplement — Tech Innov Patient Support Radiat Oncol. 2023 Sep 12;28:100219. doi: 10.1016/j.tipsro.2023.100219 (PMC10511493; doi:10.1016/j.tipsro.2023.100219), 2023-09-12
Supplement: mmc3.pdf [file mmc3.pdf]

| Bibliographic reference                                                                                                                                                                                                                                                                                                                       | Study type/<br>Design                                                                                                                           | Study quality<br>(risk of bias) | Sample size<br>n=                                                    | Participant characteristics                                                                                                                        | Participant Positioning/<br>Setup                                                                                                                                                                                                   | Immobilization device if used                                                                                          |
|-----------------------------------------------------------------------------------------------------------------------------------------------------------------------------------------------------------------------------------------------------------------------------------------------------------------------------------------------|-------------------------------------------------------------------------------------------------------------------------------------------------|---------------------------------|----------------------------------------------------------------------|----------------------------------------------------------------------------------------------------------------------------------------------------|-------------------------------------------------------------------------------------------------------------------------------------------------------------------------------------------------------------------------------------|------------------------------------------------------------------------------------------------------------------------|
| <p>Xiang Q, Jie W, Zhu K, Wang Q, Cheng J. <b>Which technique of positioning and immobilization is better for breast cancer patients in postmastectomy IMRT, single-pole or double-pole immobilization?</b> Journal of applied clinical medical physics. 2019;20(1):168-74.</p>                                                               | <p>Non-randomised comparison.</p> <p>Single pole to ipsilateral side (both hands on single pole) vs double pole</p>                             | <p>Low to moderate</p>          | <p>Single pole= 54</p> <p>Double pole =40</p> <p>N=94 in total</p>   | <p>Age 30 to 66 years (range)</p> <p>Approx 50% with left lesions,</p> <p>Mean weight 58.81 Kg (+/- 8.11) single pole</p> <p>56.5 kg (+/-8.05)</p> | <p>Supine</p> <p>Breast board apparatus</p> <p>Both arms extended above their head.</p> <p>Head was turned to the contralateral side of the affected breast</p>                                                                     | <p>Breast bracket (with elevation *based on image only, not described)</p> <p>5 mm thermoplastic mold</p>              |
| <p>Kawamura, M., Maeda, Y., Yamamoto, K., Takamatsu, S., Sato, Y., Minami, H., ... Naganawa, S. (2017). <b>Development of the breast immobilization system in prone setup: The effect of bra in prone position to improve the breast setup error.</b> Journal of applied clinical medical physics, 18(4), 155–160. doi:10.1002/acm2.12116</p> | <p>Cross-over design repeated within patient to image with and without the bra using MRI</p>                                                    | <p>Low to moderate</p>          | <p>Breast cancer patients</p> <p>N=33</p> <p>34 lesions in total</p> | <p>Median age- N/A,</p> <p>Mean weight-N/A</p> <p>Cancer stage -N/A</p> <p>Breast size: range 156 – 1,432 cc (median 498 cc)</p>                   | <p>Prone breast board</p>                                                                                                                                                                                                           | <p>With and without a modified commercial bra</p> <p>Bra settings marked on Velcro or on skin</p>                      |
| <p>Arimura T, Ogino T, Yoshiura T, Matsuyama M, Kondo N, Miyazaki H, et al. <b>A feasibility study of a hybrid breast-immobilization system for early breast cancer in proton beam therapy.</b> Medical physics. 2017;44(4):1268-74.</p>                                                                                                      | <p>Non-patient study</p> <p>Single phantom, ten repeated set-ups to assess daily variability with and without the breast cup/immobilization</p> | <p>Moderate</p>                 | <p>N/A</p>                                                           | <p>phantom characteristics: a 60-year-old woman</p> <p>unclear breast volume</p>                                                                   | <p>A special breast-immobilizing system (HyBIS; hybrid breast-immobilizing system) set-up that allows immobilization of the patient/phantom in a body cast, with a custom-made breast cup, that has a nipple hole for location.</p> | <p>An immobilization couch and vacuum body immobilizer with a separate custom-made breast cup.</p>                     |
| <p>De Puyseleyn A, De Neve W, De Wagter C. <b>A patient immobilization device for prone breast radiotherapy: Dosimetric effects and inclusion in the treatment planning system.</b> Phys Med. 2016 Jun;32(6):758-66. doi: 10.1016/j.ejmp.2016.04.013.</p>                                                                                     | <p>Non-patient study, physics dosimetric study</p>                                                                                              | <p>N/A</p>                      | <p>N/A</p>                                                           | <p>N/A</p>                                                                                                                                         | <p>Prone</p>                                                                                                                                                                                                                        | <p>Orfit All-in-One Solution (carbon fiber baseplate, support cushions and wedge support for contralateral breast)</p> |

|                                                                                                                                                                                                                                                                                                                                             |                                                                                |             |                                                                                                                    |                                                                                              |                                                                                                                                                                                                                                                                                                                                                                                                                                   |                                                                                                                                                                                                         |
|---------------------------------------------------------------------------------------------------------------------------------------------------------------------------------------------------------------------------------------------------------------------------------------------------------------------------------------------|--------------------------------------------------------------------------------|-------------|--------------------------------------------------------------------------------------------------------------------|----------------------------------------------------------------------------------------------|-----------------------------------------------------------------------------------------------------------------------------------------------------------------------------------------------------------------------------------------------------------------------------------------------------------------------------------------------------------------------------------------------------------------------------------|---------------------------------------------------------------------------------------------------------------------------------------------------------------------------------------------------------|
| <p>Kapanen M, Laaksomaa M, Skyttä T, Haltamo M, Pehkonen J, Lehtonen T, et al. <b>Residual position errors of lymph node surrogates in breast cancer adjuvant radiotherapy: Comparison of two arm fixation devices and the effect of arm position correction</b> Med Dosim. 2016 Spring;41(1):47-52. doi: 10.1016/j.meddos.2015.08.001.</p> | <p>Retrospective study comparing patients in two different arm positioning</p> | <p>High</p> | <p>n=113, consecutive left-sided pts<br/><br/>Standard wrist-hold (WH) =53<br/><br/>House-made rod-hold(RH)=60</p> | <p>Mean age, -56 yr<br/><br/>Left breast cancer<br/><br/>Post- breast conserving surgery</p> | <p>Supine<br/><br/>Both arms extended above their head.</p>                                                                                                                                                                                                                                                                                                                                                                       | <p>Candor ConBine fixation device (Candor,Gislev,Denmark)<br/><br/>Standard wrist-hold vs House-made rod-hold</p>                                                                                       |
| <p>Agostinelli S, Garelli S, Bellini A, Pupillo F, Guenzi M, Bosetti D, et al. <b>Helical Tomotherapy of the breast: can thermoplastic immobilization improve the reproducibility of the treatment setup and the accuracy of the delivered dose?</b>Phys Med. 2015 Feb;31(1):49-53. doi: 10.1016/j.ejmp.2014.09.007.</p>                    | <p>Randomized comparison</p>                                                   | <p>Low</p>  | <p>n= 16</p>                                                                                                       | <p>Age: N/A<br/><br/>Weight (Kg): No data presented<br/><br/>Stage: No data</p>              | <p>Supine<br/><br/>Both arms extended above head.<br/><br/>5 tattoos: central reference, two lateral tattoos for coronal alignment and two cranio-caudal tattoos for sagittal alignment.<br/><br/>The setup red lasers on skin tattoos with Civco Wing Board (WB group=Wing Board only) or on shell marks on Orfit thermoplastic mask (extending from the neck to the whole breast) (WB + O group= Civco Wing Board + Orfit).</p> | <p>Wing Board (Civco) +/- thermoplastic mask<br/><br/>8 patients: (, thermoplastic mask, fixed to Civco AIO indexed base plate, + five marks on mask shell.<br/><br/>8 patients: no additional mask</p> |
| <p>Cheng KF, Wu VW. <b>Comparison of the effectiveness of different immobilization systems in different body regions using daily megavoltage CT in helical tomotherapy.</b> Br J Radiol. 2014 Feb;87(1034):20130494. doi: 10.1259/bjr.20130494.</p>                                                                                         | <p>Retrospective, non-randomized comparison study</p>                          | <p>High</p> | <p>n=18 Breast</p>                                                                                                 | <p>Age: N/A<br/><br/>Weight (Kg): N/A<br/><br/>Stage: N/A</p>                                | <p>Supine<br/><br/>1)Supine on VacLok and headrest<br/><br/>Both arms extended above their head.<br/><br/>Prone: Prone breast board, with a small VacLok under head, and a contralateral breast wedge</p>                                                                                                                                                                                                                         | <p>VacLok® system (CIVCO Medical Solutions, Orange City, IA)<br/><br/>BodyFIX® system (Medical Intelligence, Medizintechnik GmbH, Schwabmünchen, Germany)</p>                                           |

|                                                                                                                                                                                                                                                                   |                                                  |                           |                                                                                                                                           |                                                                                                                                                                                |                                                                                                                                                                                                                                                                         |                                                                                                                                                                                                                                                                                                              |
|-------------------------------------------------------------------------------------------------------------------------------------------------------------------------------------------------------------------------------------------------------------------|--------------------------------------------------|---------------------------|-------------------------------------------------------------------------------------------------------------------------------------------|--------------------------------------------------------------------------------------------------------------------------------------------------------------------------------|-------------------------------------------------------------------------------------------------------------------------------------------------------------------------------------------------------------------------------------------------------------------------|--------------------------------------------------------------------------------------------------------------------------------------------------------------------------------------------------------------------------------------------------------------------------------------------------------------|
| <p>Kelly A, Hardcastle N, Metcalfe P, Cutajar D, Quinn A, Foo K, et al. <b>Surface dosimetry for breast radiotherapy in the presence of immobilization cast material.</b> Phys Med Biol. 2011 Feb 21;56(4):1001-13. doi: 10.1088/0031-9155/56/4/008.</p>          | <p>Non-patient study dosimetry phantom study</p> | <p>N/A</p>                | <p>N/A</p>                                                                                                                                | <p>Rigid anthropomorphic phantom<br/><br/>Pendulous breasts D-size</p>                                                                                                         | <p>Supine<br/><br/>Alpha-cradle<br/><br/>Aligned using room laser alignment to markers placed at the time of simulation.</p>                                                                                                                                            | <p>Orfit immobilization device (Orfit Industries America, NY, USA) = unstretched = 2.6mm thick<br/><br/>Thick vs thin immobilization cast material</p>                                                                                                                                                       |
| <p>Strydhorst JH, Caudrelier JM, Clark BG, Montgomery LA, Fox G, MacPherson MS. <b>Evaluation of a thermoplastic immobilization system for breast and chest wall radiation therapy.</b> Med Dosim. 2011 Spring;36(1):81-4. doi: 10.1016/j.meddos.2010.01.001.</p> | <p>Cohort study</p>                              | <p>High</p>               | <p>n= 8 total<br/>3=lumpectomy<br/>(1 left-sided, 2 right-sided)<br/><br/>5=mastectomy<br/>(3 right-sided, 1 left-sided, 1 Bilateral)</p> | <p>Patient from another trial locoregional XRT post lumpectomy or mastectomy<br/><br/>Age: N/A<br/><br/>Weight (Kg): N/A<br/><br/>Stage: IIb–III (+LN involvement upfront)</p> | <p>Supine<br/><br/>Both arms extended above their head<br/><br/>Lumpectomy: ipsilateral breast pushed up to the front of the chest and the contralateral breast fall to the side<br/><br/>Mastectomy: bolus on top of the thermoplastic shell over the surgical bed</p> | <p>Breastboard (CIVCO) + Thermoplastic immobilization (~3mm) extending from the shoulders to the ribcage</p>                                                                                                                                                                                                 |
| <p>Bush DA, Slater JD, Garberoglio C, Yuh G, Hocko JM, Slater JM. <b>A technique of partial breast irradiation utilizing proton beam radiotherapy: comparison with conformal x-ray therapy.</b> Cancer J. 2007 Mar-Apr;13(2):114-8.</p>                           | <p>Single cohort study with no comparator</p>    | <p>Not able to assess</p> | <p>n= 20 (Prone device), 10 only for dosimetry comparison</p>                                                                             | <p>Age :N/A<br/><br/>Weight (Kg):N/A<br/><br/>Stage: &lt;3CM<br/><br/>Post lumpectomy</p>                                                                                      | <p>Prone</p>                                                                                                                                                                                                                                                            | <p>Treatment brassiere (Med-Tec Inc., Orange City, IA)<br/><br/>Breast prone in cylindrical polyvinyl chloride shell with the upper and lower body supported and immobilized with Vac-Lok foam vacuum bead cushions<br/><br/>Upper chest and breast areas are immobilized with two-part expandable foam.</p> |
| <p>Yu CX, Shao X, Zhang J, Regine W, Zheng M, Yu YS, et al. <b>GammaPod-a new device dedicated for stereotactic radiotherapy of breast cancer.</b> Med Phys. 2013 May;40(5):051703. doi: 10.1118/1.4798961.</p>                                                   | <p>Feasibility study</p>                         | <p>Not able to assess</p> | <p>N/A</p>                                                                                                                                | <p>Race: N/A<br/><br/>Age: N/A<br/><br/>Weight (Kg) N/A<br/><br/>Stage: N/A<br/><br/>3 artificial clinical cases</p>                                                           | <p>Prone</p>                                                                                                                                                                                                                                                            | <p>A patented breast immobilization cup with a two-layer design using negative air pressure<br/><br/>Vacuum-assisted breast immobilization cup with built-in stereotactic frame for GammaPod treatment</p>                                                                                                   |

|                                                                                                                                                                                                                                                                             |                                                                                        |                                             |                                                           |                                                                                                                                                                                                                        |                                                                                                                                                                     |                                                                                                                                                                                                                        |
|-----------------------------------------------------------------------------------------------------------------------------------------------------------------------------------------------------------------------------------------------------------------------------|----------------------------------------------------------------------------------------|---------------------------------------------|-----------------------------------------------------------|------------------------------------------------------------------------------------------------------------------------------------------------------------------------------------------------------------------------|---------------------------------------------------------------------------------------------------------------------------------------------------------------------|------------------------------------------------------------------------------------------------------------------------------------------------------------------------------------------------------------------------|
| <p>Arenas M, Hernandez V, Farrus B, Muller K, Gascon M, Pardo A, et al. <b>Do breast cups improve breast cancer dosimetry? A comparative study for patients with large or pendulous breasts.</b> Acta Oncol. 2014 Jun;53(6):795-801. doi: 10.3109/0284186X.2014.893062.</p> | <p>Non-randomized, Self-controlled patient study (with/out breast cup)</p>             | <p>Low</p>                                  | <p>n= 12<br/>Each patient scanned with/out breast cup</p> | <p>Age N/A<br/>Weight (Kg) N/A<br/>Stage: stage I and II breast carcinoma<br/>Large: D size breast cup)<br/>Pendulous: breast tissue that fall towards the mid-axillary line or farther posteriorly and superiorly</p> | <p>Supine<br/>10–20° inclined on breast-board<br/>Ipsilateral arm extended above head<br/>Contralateral breast compressed towards the rib cage by a cloth strap</p> | <p>Breast cups (CIVCO Medical Solutions, Kalona, IA, USA) held in place by a non-elastic cloth strap fixed around the patient's body<br/><br/>Cups = 0.50 ± 0.05 mm thick transparent plastic material</p>             |
| <p>Wroe AJ, Bush DA, Schulte RW, Slater JD. <b>Clinical immobilization techniques for proton therapy.</b> Technol Cancer Res Treat. 2015 Feb;14(1):71-9. doi: 10.7785/tcrt.2012.500398.</p>                                                                                 | <p>Summary paper</p>                                                                   | <p>Not able to assess</p>                   | <p>N/A</p>                                                | <p>Age N/A<br/>Weight (Kg) N/A<br/>Stage: N/A</p>                                                                                                                                                                      | <p>Prone</p>                                                                                                                                                        | <p>Vacuum bags shaped to conform to the pod and patient contour.<br/><br/>Clear plastic breast cup sized to the patient for breast support, with the nipple indexed to the central axis opening on the breast cup.</p> |
| <p>Gary Dillon, Robert Woodburn, Phillip Kulig, <b>A QA Analysis of a Contrast Localized Linac-Based Technique for Hypo-Fractionated Partial Breast Radiotherapy</b> International Journal of Radiology Vol2, No1(2015)</p>                                                 | <p>Prospective study phase II trial</p>                                                | <p>Not able to assess with only QA data</p> | <p>n= 10<br/>(6 left-sided, 4 right-sided)</p>            | <p>Stage: early stage breast ca</p>                                                                                                                                                                                    | <p>Supine<br/>3 internal gold-seed markers inside the surgical bed post-surgery</p>                                                                                 | <p>Elekta Stereotactic Body Frame (SBR) body frame with diaphragmatic plunger to reduce breathing</p>                                                                                                                  |
| <p>Lei Shi, Chunbo He, Xu Guo, Lisong Zhao, Tianyi Fu, Beiqiu Han. <b>A new method to deliver breast and chest wall radiation in breast radiotherapy for lung and heart sparing.</b> Int J Clin Exp Med 2016;9(7):13484-13492</p>                                           | <p>Retrospective, non-randomized, patient selected based on poor dose distribution</p> | <p>Moderate</p>                             | <p>n= 42<br/>(20=CCB-TPM)</p>                             | <p>Age 42years (median)<br/>Weight (Kg)-N/A<br/>Stage: T1N0M0 or stage Tis. Post lumpectomy</p>                                                                                                                        | <p>Supine<br/>Both arms extended above their head.</p>                                                                                                              | <p>Wedged Breast-Board (WBB) vs. Commercial carbonic board fixed by a thermoplastic porous membrane (CCB-TPM)</p>                                                                                                      |
| <p>Snider JW, Mutaf Y, Nichols E, Hall A, Vadnais P, Regine WF, et al. <b>Dosimetric Improvements with a Novel Breast Stereotactic Radiotherapy Device for Delivery of Preoperative Partial-Breast Irradiation.</b> Oncology. 2017;92(1):21-30. doi: 10.1159/000449388.</p> | <p>Cross-over design planning study</p>                                                | <p>Low</p>                                  | <p>n= 15</p>                                              | <p>Stage: N/A<br/>breast conservation therapy</p>                                                                                                                                                                      | <p>Prone</p>                                                                                                                                                        | <p>Breast-specific stereotactic radiotherapy device (BSRTD) – GammaPod. Vacuum-assisted breast immobilization device uses a 2-layered cup secured to the breast using negative pressure</p>                            |

**Note: The papers that were selected based on the title and after reading were not used in the guideline are greyed out in the evidence table.**

#### REFERENCE

1. Xiang, Q., et al., Which technique of positioning and immobilization is better for breast cancer patients in postmastectomy IMRT, single-pole or double-pole immobilization? *Journal of Applied Clinical Medical Physics*, 2019. 20(1): p. 168-174.
2. Kawamura, M., et al., Development of the breast immobilization system in prone setup: The effect of bra in prone position to improve the breast setup error. *J Appl Clin Med Phys*, 2017. 18(4): p. 155-160.
3. Arimura, T., et al., A feasibility study of a hybrid breast-immobilization system for early breast cancer in proton beam therapy. *Medical Physics*, 2017. 44(4): p. 1268-1274.
4. De Puyseleer, A., W. De Neve, and C. De Wagter, A patient immobilization device for prone breast radiotherapy: Dosimetric effects and inclusion in the treatment planning system. *Physica Medica*, 2016. 32(6): p. 758-766.
5. Kapanen, M., et al., Residual position errors of lymph node surrogates in breast cancer adjuvant radiotherapy: Comparison of two arm fixation devices and the effect of arm position correction. *Medical Dosimetry*, 2016. 41(1): p. 47-52.
6. Agostinelli, S., et al., Helical Tomotherapy of the breast: Can thermoplastic immobilization improve the reproducibility of the treatment setup and the accuracy of the delivered dose? *Physica Medica*, 2015. 31(1): p. 49-53.
7. Cheng, K.-F. and V.W.C. Wu, Comparison of the effectiveness of different immobilization systems in different body regions using daily megavoltage CT in helical tomotherapy. *The British Journal of Radiology*, 2014. 87(1034): p. 20130494.
8. Kelly, A., et al., Surface dosimetry for breast radiotherapy in the presence of immobilization cast material. *Physics in Medicine and Biology*, 2011. 56(4): p. 1001-1013.
9. Strydhorst, J.H., et al., Evaluation of a Thermoplastic Immobilization System for Breast and Chest Wall Radiation Therapy. *Medical Dosimetry*, 2011. 36(1): p. 81-84.
10. Bush, D.A., et al., A Technique of Partial Breast Irradiation Utilizing Proton Beam Radiotherapy: Comparison with Conformal X-Ray Therapy. *The Cancer Journal*, 2007. 13(2): p. 114-118.
11. Yu, C.X., et al., GammaPod—A new device dedicated for stereotactic radiotherapy of breast cancer. *Medical Physics*, 2013. 40(5): p. 051703.
12. Arenas, M., et al., Do breast cups improve breast cancer dosimetry? A comparative study for patients with large or pendulous breasts. *Acta Oncologica*, 2014. 53(6): p. 795-801.
13. Wroe, A.J., et al., Clinical Immobilization Techniques for Proton Therapy. *Technology in Cancer Research & Treatment*, 2015. 14(1): p. 71-79.
14. Dillon, G.W., Robert III; Kulig, Phil A QA Analysis of a Contrast Localized Linac-Based Technique for Hypo-Fractionated Partial Breast Radiotherapy. *International Journal of Radiology*, 2015. 2(1).
15. Lei Shi, C.H., Xu Guo, Lisong Zhao, Tianyi Fu, Beiqiu Han, A new method to deliver breast and chest wall radiation in breast radiotherapy for lung and heart sparing. *Int J Clin Exp Med* 2016. 9(7): p. 13484-13492.
16. Snider Iii, J.W., et al., Dosimetric Improvements with a Novel Breast Stereotactic Radiotherapy Device for Delivery of Preoperative Partial-Breast Irradiation. *Oncology*, 2017. 92(1): p. 21-30.
